# Supplementary material
Source: PubMed Central journal article supplement (PMC2575954)
Supplement: 00297.2007_1.pdf [file 00297.2007_1.pdf]

## SUPPLEMENTARY MATERIAL

for

“Global Expression Profiling Identifies a Novel Biosignature for Protein Aggregation

R120GCryAB Cardiomyopathy in Mice” Namakkal S. Rajasekaran, Matthew A. Firpo, Brett A.

Milash, Robert B. Weiss and Ivor J. Benjamin

## METHODS

Microarray Printing: PCR products were prepared for spotting by dissolving the samples in a solution of 50% DMSO using a Lucidea Array Spotter (Amersham BioSciences) onto on Corning UltraGAPs slides. The final concentration of these products averaged 100 ng/μl. The spotter contained a 24 pen print set. Each pen, through capillary action when dipped into the spotting solution, takes up less than 200 nl of sample. Glass microscope slides that have been chemically modified with a uniform coating of gamma-amino-propyl silane were positioned on a slide tray of the microarray spotter and held down by vacuum pressure to prevent movement of the slide during the printing process. The physical contact of the spotting pens with the slide surface results in the deposition of approximately 1 nl droplets of microarray printing solution on the slide. The drying rate of these droplets is critical for effective binding of the DNA to the amine groups on the modified slide surface. This is controlled by maintaining 55% relative humidity in the microarray printing compartment and through the hygroscopic properties of DMSO (which slow the drying process). Following completion of a print session, DNA targets were cross-linked to the slide surface at 250 mJ using a Stratagene Stratalinker.

Labeling of Samples: Incorporation of Cy3 or Cy5 fluorescent cyanine dyes was accomplished during first strand cDNA probe synthesis using messenger RNA as a template. Random nonamers were used to prime first strand cDNA synthesis using Superscript II

(Stratagene) in the presence of either Cy3-dCTP or Cy5-dCTP. The resulting cDNA/RNA hybrid was treated with 0.25 M NaOH to hydrolyze RNA. The first strand cDNA molecule was then purified using a Qiagen QIAquick PCR purification kit to remove unincorporated fluorescent nucleotides and primers. The purified labeled sample was subsequently concentrated through speedvac centrifugation.

Hybridization of Labeled Samples: Labeled cDNA was heat denatured at 95°C for 10 minutes and then combined with Ambion SlideHyb Survey Kit Glass Array Hyb Buffer #1 and incubated in a Corning Microarray Hyb cassette overnight at 48°C. The following day, slides were washed as below:

- a. 2X SSC, 0.5% SDS at 48°C for 15 minutes
- b. 2X SSC, 0.5% SDS at 48°C for 15 minutes
- c. 0.5X SSC, 0.5% SDS at 48°C for 15 minutes
- d. 0.5X SSC, 0.5% SDS at 48°C for 15 minutes

Microarray slides were then air-dried by directing compressed air across the surface of the slide.

Microarray Scanning and Image Processing: Microarray slides are scanned in an Axon GenePix 4000B Scanner at a 10 µm/pixel resolution. The Axon scanner simultaneously scans slides using lasers that are optimized for detection of Cy3 and Cy5, resulting in perfect overlay of the two images. This scanner has a dynamic range of detection of four orders of magnitude. The resulting Cy3 and Cy5 images were qualitatively and quantitatively evaluated using ImaGene software (BioDiscovery). This included calculations to make adjustments for spot diameter, calculate localized background values, define and remove artifactual signal, measure spot signal intensity and determine the standard deviation of pixel values within a spot. The software also used various schemas to identify and flag suspicious spots and allow the researcher the option of removing these spots from further consideration.

## TABLES AND FIGURES

**Table S1:** Results of ANOVA Analysis. The number of sequences with altered expression in hCryAB WT, hR120GCryAB or both hCryAB WT and hR120GCryAB relative to the NTG control are listed. Adjusted P-values were determined by controlling the false discovery rate.

| Number of Sequences Identified |          | Correction for Multiple Comparisons |
|--------------------------------|----------|-------------------------------------|
| 3 Months                       | 6 Months |                                     |
| 127                            | 151      | P < 0.05 (uncorrected)              |
| 126                            | 151      | P < 0.05 (adjusted)                 |
| 108                            | 126      | P < 0.01 (adjusted)                 |
| 95                             | 114      | P < 0.005 (adjusted)                |

**Table S2:** Gene lists for cellular pathways with > 1.5-fold altered expression in hR120GCryAB hearts relative to hCryAB WT hearts. Ratio refers to the fold change in hR120GCryAB hearts and Direction indicates if the gene was upregulated or down regulated.

|                                     | Accession | Gene Symbol | Gene ID | Ratio | Direction | Gene Name                                                    |
|-------------------------------------|-----------|-------------|---------|-------|-----------|--------------------------------------------------------------|
| <b>3 MONTH</b>                      |           |             |         |       |           |                                                              |
| Glutathione metabolism              |           |             |         |       |           |                                                              |
|                                     | BG065030  | Gpx1        | 14775   | 1.61  | up        | glutathione peroxidase 1                                     |
|                                     | BG073718  | Gpx3        | 14778   | 2.42  | up        | glutathione peroxidase 3                                     |
|                                     | BG073190  | Gsta4       | 14860   | 1.59  | up        | glutathione S-transferase, alpha 4                           |
|                                     | BG086970  | Gstm1       | 14862   | 1.70  | up        | glutathione S-transferase, mu 1                              |
|                                     | BG074397  | Gstm1       | 14862   | 1.79  | up        | glutathione S-transferase, mu 1                              |
|                                     | BG086330  | Mgst1       | 56615   | 1.58  | up        | microsomal glutathione S-transferase 1                       |
| Antigen processing and presentation |           |             |         |       |           |                                                              |
|                                     | BG078496  | Ctsl        | 13039   | 1.60  | up        | cathepsin L                                                  |
|                                     | BG077017  | H2-Eb1      | 14969   | 4.07  | up        | histocompatibility 2, class II antigen E beta                |
|                                     | BG078795  | Hspa5       | 14828   | 2.12  | down      | heat shock 70kD protein 5 (glucose-regulated protein)        |
|                                     | BG064772  | Hspca       | 15519   | 1.62  | up        | heat shock protein 90kDa alpha (cytosolic), class A member 1 |
|                                     | BG074109  | Hspca       | 15519   | 1.76  | up        | heat shock protein 90kDa alpha (cytosolic), class A member 1 |
|                                     | BG064774  | Hspca       | 15519   | 1.70  | up        | heat shock protein 90kDa alpha (cytosolic), class A member 1 |
|                                     | BG088007  | Hspcb       | 15516   | 1.97  | up        | heat shock protein 90kDa alpha (cytosolic), class B member 1 |

|                                            |          |       |        |      |      |                                                                                                       |
|--------------------------------------------|----------|-------|--------|------|------|-------------------------------------------------------------------------------------------------------|
|                                            | BG079631 | Hspcb | 15516  | 1.70 | up   | heat shock protein 90kDa alpha (cytosolic), class B member 1                                          |
|                                            | BQ550275 | li    | 16149  | 1.73 | up   | CD74 antigen (invariant polypeptide of major histocompatibility complex, class II antigen-associated) |
|                                            | BG073636 | Psme1 | 19186  | 1.50 | down | proteasome (prosome, macropain) 28 subunit, alpha                                                     |
| <b>Complement and coagulation cascades</b> |          |       |        |      |      |                                                                                                       |
|                                            | BG074814 | C1qa  | 12259  | 2.02 | up   | complement component 1, q subcomponent, alpha polypeptide                                             |
|                                            | BG087868 | C1qb  | 12260  | 1.96 | up   | complement component 1, q subcomponent, beta polypeptide                                              |
|                                            | AW547306 | C1qg  | 12262  | 1.70 | up   | complement component 1, q subcomponent, C chain                                                       |
|                                            | BQ553183 | F13a1 | 74145  | 1.70 | up   | coagulation factor XIII, A1 subunit                                                                   |
| <b>6 MONTH</b>                             |          |       |        |      |      |                                                                                                       |
| <b>Up-regulated</b>                        |          |       |        |      |      |                                                                                                       |
| <b>Ribosome</b>                            |          |       |        |      |      |                                                                                                       |
|                                            | BG085976 | Rpl10 | 110954 | 1.73 | up   | ribosomal protein 10                                                                                  |
|                                            | BG072592 | Rpl3  | 27367  | 2.03 | up   | ribosomal protein L3                                                                                  |
|                                            | BG079511 | Rpl3  | 27367  | 1.96 | up   | ribosomal protein L3                                                                                  |
|                                            | BG072595 | Rpl3  | 27367  | 2.64 | up   | ribosomal protein L3                                                                                  |
|                                            | BG074107 | Rpl3  | 27367  | 2.31 | up   | ribosomal protein L3                                                                                  |
|                                            | BG072985 | Rpl7  | 19989  | 1.77 | up   | ribosomal protein L7                                                                                  |
|                                            | BG063847 | Rpl8  | 26961  | 1.74 | down | ribosomal protein L8                                                                                  |
|                                            | BG085624 | Rps4x | 20102  | 1.77 | up   | ribosomal protein S4, X-linked                                                                        |
|                                            | BG072598 | Rps5  | 20103  | 1.51 | up   | ribosomal protein S5                                                                                  |
|                                            | BG072600 | Rps5  | 20103  | 1.58 | up   | ribosomal protein S5                                                                                  |
|                                            | AW556153 | Rps6  | 20104  | 1.53 | up   | ribosomal protein S6                                                                                  |
| <b>Glutathione metabolism</b>              |          |       |        |      |      |                                                                                                       |

|                                     |          |        |       |      |      |                                                              |
|-------------------------------------|----------|--------|-------|------|------|--------------------------------------------------------------|
|                                     | BG073718 | Gpx3   | 14778 | 1.58 | up   | glutathione peroxidase 3                                     |
|                                     | BG073190 | Gsta4  | 14860 | 1.68 | up   | glutathione S-transferase, alpha 4                           |
|                                     | BG074397 | Gstm1  | 14862 | 1.59 | up   | glutathione S-transferase, mu 1                              |
|                                     | Bg086330 | Mgst1  | 56615 | 1.60 | up   | microsomal glutathione S-transferase 1                       |
|                                     | BG088778 | Mgst3  | 66447 | 1.59 | down | microsomal glutathione S-transferase 3                       |
|                                     | BG072517 | Gstm7  | 68312 | 1.69 | down | glutathione S-transferase, mu 7                              |
|                                     |          |        |       |      |      |                                                              |
| Antigen processing and presentation |          |        |       |      |      |                                                              |
|                                     | BG078496 | Ctsl   | 13039 | 1.68 | up   | cathepsin L                                                  |
|                                     | BG084164 | Grp58  | 14827 | 1.68 | up   | protein disulfide isomerase associated 3                     |
|                                     | BG077017 | H2-Eb1 | 14969 | 2.05 | up   | histocompatibility 2, class II antigen E beta                |
|                                     | BG064772 | Hspca  | 15519 | 2.43 | up   | heat shock protein 90kDa alpha (cytosolic), class A member 1 |
|                                     | BG074109 | Hspca  | 15519 | 2.86 | up   | heat shock protein 90kDa alpha (cytosolic), class A member 1 |
|                                     | BG064774 | Hspca  | 15519 | 1.77 | up   | heat shock protein 90kDa alpha (cytosolic), class A member 1 |
|                                     | BG063605 | Hspca  | 15519 | 2.41 | up   | heat shock protein 90kDa alpha (cytosolic), class A member 1 |
|                                     | BG088007 | Hspcb  | 15516 | 1.87 | up   | heat shock protein 90kDa alpha (cytosolic), class B member 1 |
|                                     | BG067038 | Hspcb  | 15516 | 1.58 | up   | heat shock protein 90kDa alpha (cytosolic), class B member 1 |
|                                     | BG079631 | Hspcb  | 15516 | 1.64 | up   | heat shock protein                                           |

|                             |          |        |        |      |      |                                                                                                       |
|-----------------------------|----------|--------|--------|------|------|-------------------------------------------------------------------------------------------------------|
|                             |          |        |        |      |      | 90kDa alpha (cytosolic), class B member 1                                                             |
|                             | BQ550275 | li     | 16149  | 1.59 | up   | CD74 antigen (invariant polypeptide of major histocompatibility complex, class II antigen-associated) |
|                             | BG073636 | Psme1  | 19186  | 1.51 | down | proteasome (prosome, macropain) 28 subunit, alpha                                                     |
|                             | BG066650 | Psme1  | 19186  | 1.51 | down | proteasome (prosome, macropain) 28 subunit, alpha                                                     |
| Cell communication          |          |        |        |      |      |                                                                                                       |
|                             | BG063870 | Actb   | 11461  | 1.83 | up   | actin, beta, cytoplasmic                                                                              |
|                             | C78835   | Actb   | 11461  | 1.62 | up   | actin, beta, cytoplasmic                                                                              |
|                             | BG077677 | Actb   | 11461  | 2.08 | up   | actin, beta, cytoplasmic                                                                              |
|                             | BG063722 | Actb   | 11461  | 1.51 | up   | actin, beta, cytoplasmic                                                                              |
|                             | BG073735 | Col1a2 | 12843  | 1.81 | up   | procollagen, type I, alpha 2                                                                          |
|                             | BG074327 | Col3a1 | 12825  | 2.09 | up   | procollagen, type III, alpha 1                                                                        |
|                             | BG086357 | Col3a1 | 12825  | 2.18 | up   | procollagen, type III, alpha 1                                                                        |
|                             | BG085576 | Col3a1 | 12825  | 2.10 | up   | procollagen, type III, alpha 1                                                                        |
|                             | BG088953 | Col4a1 | 12826  | 1.54 | up   | procollagen, type IV, alpha 1                                                                         |
|                             | BQ554492 | Des    | 13346  | 1.62 | up   | desmin                                                                                                |
|                             | BG077621 | Lmna   | 16905  | 1.52 | up   | lamin A                                                                                               |
| Aminoacyl-tRNA biosynthesis |          |        |        |      |      |                                                                                                       |
|                             | C77246   | Yars   | 107271 | 1.69 | up   | tyrosyl-tRNA synthetase                                                                               |
|                             | BG079401 | Nars   | 70223  | 1.51 | up   | asparaginyl-tRNA synthetase                                                                           |
|                             | BG079434 | Sars1  | 20226  | 1.53 | up   | seryl-aminoacyl-tRNA synthetase                                                                       |
|                             |          |        |        |      |      |                                                                                                       |

| <b>Down-regulated</b>     |          |          |        |      |      |                                                                                          |
|---------------------------|----------|----------|--------|------|------|------------------------------------------------------------------------------------------|
| Oxidative phosphorylation |          |          |        |      |      |                                                                                          |
|                           | BG069853 | Uqcr     | 66594  | 1.52 | down | ubiquinol-cytochrome c reductase (6.4kD) subunit                                         |
|                           | BG086273 | Grim19   | 67184  | 1.56 | down | NADH dehydrogenase (ubiquinone) 1 alpha subcomplex, 13                                   |
|                           | BQ553743 | Uqcrcfs1 | 66694  | 1.55 | down | ubiquinol-cytochrome c reductase, Rieske iron-sulfur polypeptide 1                       |
|                           | BG074111 | Atp5c1   | 11949  | 1.83 | down | ATP synthase, H <sup>+</sup> transporting, mitochondrial F1 complex, gamma polypeptide 1 |
|                           | BG088873 | Atp5e    | 67126  | 1.55 | down | ATP synthase, H <sup>+</sup> transporting, mitochondrial F1 complex, epsilon subunit     |
|                           | BG063439 | Atp5h    | 71679  | 1.51 | down | ATP synthase, H <sup>+</sup> transporting, mitochondrial F0 complex, subunit d           |
|                           | BG072826 | Atp5i    | 27425  | 1.71 | down | ATP synthase, H <sup>+</sup> transporting, mitochondrial F0 complex, subunit g           |
|                           | BG086960 | Atp6v1h  | 108664 | 1.61 | up   | ATPase, H <sup>+</sup> transporting, lysosomal V1 subunit H                              |
|                           | BG076562 | Ndufb7   | 66916  | 1.52 | down | NADH dehydrogenase (ubiquinone) 1 beta subcomplex, 7                                     |
|                           | BG064317 | Cox7b    | 66142  | 1.73 | down | cytochrome c oxidase subunit VIIb                                                        |
|                           | BG077969 | Ndufs8   | 225887 | 1.66 | down | NADH dehydrogenase (ubiquinone) Fe-S protein 8                                           |
|                           | BG075903 | Ndufc1   | 66377  | 1.54 | down | NADH dehydrogenase (ubiquinone) 1,                                                       |



|                       |          |         |        |      |      |                                                                              |
|-----------------------|----------|---------|--------|------|------|------------------------------------------------------------------------------|
|                       |          |         |        |      |      | subcomplex unknown, 1                                                        |
|                       | BQ554627 | Ndufa4  | 17992  | 1.69 | down | NADH dehydrogenase (ubiquinone) 1 alpha subcomplex, 4                        |
|                       | BG086348 | Ndufb10 | 68342  | 1.64 | down | NADH dehydrogenase (ubiquinone) 1 beta subcomplex, 10                        |
|                       | BG087636 | Ndufb9  | 66218  | 1.65 | down | NADH dehydrogenase (ubiquinone) 1 beta subcomplex, 9                         |
|                       | BG066265 | Ndufs4  | 17993  | 1.65 | down | NADH dehydrogenase (ubiquinone) Fe-S protein 4                               |
|                       | BG072514 | Np15    | 104130 | 1.53 | down |                                                                              |
|                       | BG084240 | Ndufs7  | 75406  | 1.69 | down | NADH dehydrogenase (ubiquinone) Fe-S protein 7                               |
|                       | BG086026 | Sdha    | 66945  | 1.86 | down | succinate dehydrogenase complex, subunit A, flavoprotein (Fp)                |
|                       | BG069853 | Uqcrc1  | 22273  | 1.58 | down | ubiquinol-cytochrome c reductase core protein 1                              |
| Fatty acid metabolism |          |         |        |      |      |                                                                              |
|                       | BG065314 | Acadm   | 11364  | 1.70 | down | acetyl-Coenzyme A dehydrogenase, medium chain                                |
|                       | BG065033 | Acads   | 11409  | 1.51 | down | acyl-Coenzyme A dehydrogenase, short chain                                   |
|                       | BG083405 | Acat1   | 110446 | 1.52 | down | acetyl-CoA acetyltransferase                                                 |
|                       | BG073167 | Hsd17b4 | 15488  | 2.01 | up   | hydroxysteroid (17-beta) dehydrogenase 4                                     |
|                       | BG069423 | Dci     | 13177  | 2.17 | down | dodecenoyl-Coenzyme A delta isomerase (3,2 trans-enoyl-Coenzyme A isomerase) |

|                                            |          |        |        |      |      |                                                                                                                                       |
|--------------------------------------------|----------|--------|--------|------|------|---------------------------------------------------------------------------------------------------------------------------------------|
|                                            | BG079992 | Echs1  | 93747  | 2.01 | down | enoyl Coenzyme A hydratase, short chain, 1, mitochondrial                                                                             |
|                                            | BG074754 | Acsl1  | 14081  | 1.56 | down | acyl-CoA synthetase long-chain family member 1                                                                                        |
|                                            | BG087380 | Hadha  | 97212  | 1.63 | down | hydroxyacyl-Coenzyme A dehydrogenase/3-ketoacyl-Coenzyme A thiolase/enoyl-Coenzyme A hydratase (trifunctional protein), alpha subunit |
|                                            | BG086728 | Hadhsc | 15107  | 2.33 | down | L-3-hydroxyacyl-Coenzyme A dehydrogenase, short chain                                                                                 |
|                                            |          |        |        |      |      |                                                                                                                                       |
| Carbon fixation                            |          |        |        |      |      |                                                                                                                                       |
|                                            | BG067706 | Gpt2   | 108682 | 1.69 | down | glutamic pyruvate transaminase (alanine aminotransferase) 2                                                                           |
|                                            | BG082516 | Fbp2   | 14120  | 1.54 | down | fructose bisphosphatase 2                                                                                                             |
|                                            | BG078765 | Got2   | 14719  | 1.66 | down | glutamate oxaloacetate transaminase 2, mitochondrial                                                                                  |
|                                            | BQ550883 | Mdh2   | 17448  | 1.57 | down | malate dehydrogenase 2, NAD (mitochondrial)                                                                                           |
|                                            | BG067227 | Mdh1   | 17449  | 2.00 | down | malate dehydrogenase 1, NAD (soluble)                                                                                                 |
|                                            | BG064747 | Gpt1   | 76282  | 1.85 | down | glutamic pyruvic transaminase 1, soluble                                                                                              |
|                                            | BG075310 | Tkt    | 21881  | 1.56 | up   | transketolase                                                                                                                         |
|                                            |          |        |        |      |      |                                                                                                                                       |
| Valine, leucine and isoleucine degradation |          |        |        |      |      |                                                                                                                                       |
|                                            | BG065314 | Acadm  | 11364  | 1.70 | down | acetyl-Coenzyme A dehydrogenase, medium chain                                                                                         |
|                                            | BG065033 | Acads  | 11409  | 1.51 | down | acyl-Coenzyme A                                                                                                                       |

|                           |          |         |        |      |      |                                                                                                                                       |
|---------------------------|----------|---------|--------|------|------|---------------------------------------------------------------------------------------------------------------------------------------|
|                           |          |         |        |      |      | dehydrogenase, short chain                                                                                                            |
|                           | BG083405 | Acat1   | 110446 | 1.52 | down | acetyl-CoA acetyltransferase                                                                                                          |
|                           | BG087153 | Bckdha  | 12039  | 1.71 | down | branched chain ketoacid dehydrogenase E1, alpha polypeptide                                                                           |
|                           | BG073167 | Hsd17b4 | 15488  | 2.01 | up   | hydroxysteroid (17-beta) dehydrogenase 4                                                                                              |
|                           | BG079992 | Echs1   | 93747  | 2.01 | down | enoyl Coenzyme A hydratase, short chain, 1, mitochondrial                                                                             |
|                           | BG087380 | Hadha   | 97212  | 1.63 | down | hydroxyacyl-Coenzyme A dehydrogenase/3-ketoacyl-Coenzyme A thiolase/enoyl-Coenzyme A hydratase (trifunctional protein), alpha subunit |
|                           | BG086728 | Hadhsc  | 15107  | 2.33 | down | L-3-hydroxyacyl-Coenzyme A dehydrogenase, short chain                                                                                 |
|                           | BG070984 | Ivd     | 56357  | 1.79 | down | isovaleryl coenzyme A dehydrogenase                                                                                                   |
|                           |          |         |        |      |      |                                                                                                                                       |
| Citrate cycle (TCA cycle) |          |         |        |      |      |                                                                                                                                       |
|                           | BG063733 | Cs      | 12974  | 1.54 | down | citrate synthase                                                                                                                      |
|                           | BQ550883 | Mdh2    | 17448  | 1.57 | down | malate dehydrogenase 2, NAD (mitochondrial)                                                                                           |
|                           | BG067227 | Mdh1    | 14779  | 2.00 | down | malate dehydrogenase 1, NAD (soluble)                                                                                                 |
|                           | BG086026 | Sdha    | 66945  | 1.86 | down | succinate dehydrogenase complex, subunit A, flavoprotein (Fp)                                                                         |
|                           | BG068897 | Sucla2  | 20916  | 2.17 | down | succinate-Coenzyme A ligase, ADP-forming, beta subunit                                                                                |
|                           |          |         |        |      |      |                                                                                                                                       |
| Pyruvate metabolism       |          |         |        |      |      |                                                                                                                                       |

|                                  |          |        |        |      |      |                                                                      |
|----------------------------------|----------|--------|--------|------|------|----------------------------------------------------------------------|
|                                  | BG083405 | Acat1  | 110446 | 1.52 | down | acetyl-CoA<br>acetyltransferase                                      |
|                                  | BG073920 | Ldh2   | 16832  | 1.56 | down | lactate<br>dehydrogenase B                                           |
|                                  | BQ550883 | Mdh2   | 17448  | 1.57 | down | malate<br>dehydrogenase 2,<br>NAD (mitochondrial)                    |
|                                  | BG067227 | Mdh1   | 17449  | 2.00 | down | malate<br>dehydrogenase 1,<br>NAD (soluble)                          |
|                                  | BG068736 | Pdha1  | 18597  | 1.58 | down | pyruvate<br>dehydrogenase E1<br>alpha 1                              |
| Glycolysis / Gluconeogenesis     |          |        |        |      |      |                                                                      |
|                                  | BG075245 | Akr1a4 | 58810  | 1.54 | up   | aldo-keto reductase<br>family 1, member A4<br>(aldehyde reductase)   |
|                                  | BQ554389 | Eno3   | 13808  | 2.90 | down | enolase 3, beta<br>muscle                                            |
|                                  | BG082516 | Fbp2   | 14120  | 1.54 | down | fructose<br>bisphosphatase 2                                         |
|                                  | BG073920 | Ldh2   | 16832  | 1.56 | down | lactate<br>dehydrogenase B                                           |
|                                  | BG068736 | Pdha1  | 18597  | 1.58 | down | pyruvate<br>dehydrogenase E1<br>alpha 1                              |
|                                  | BG088948 | Pfkm   | 18642  | 1.52 | down | phosphofructokinase,<br>muscle                                       |
| Alanine and aspartate metabolism |          |        |        |      |      |                                                                      |
|                                  | BG067706 | Gpt2   | 108682 | 1.69 | down | glutamic pyruvate<br>transaminase<br>(alanine<br>aminotransferase) 2 |
|                                  | BG078765 | Got2   | 14719  | 1.66 | down | glutamate<br>oxaloacetate<br>transaminase 2,<br>mitochondrial        |
|                                  | BG064747 | Gpt1   | 76282  | 1.85 | down | glutamic pyruvic<br>transaminase 1,<br>soluble                       |
|                                  | BG079401 | Nars   | 70223  | 1.51 | up   | asparaginyI-tRNA<br>synthetase                                       |

**Table S3:** Comparison of gene expression measures by microarray and Northern blot analyses. Data represents fold-change in hR120GCryAB relative to hCryAB WT controls. Corresponding fold-changes calculated from the Affymetrix microarray validation are shown in parentheses.

|          | cDNA Microarray Fold-Change<br>(Affymetrix Microarray at 6 months) |             | Northern Blot Fold-Change |          |
|----------|--------------------------------------------------------------------|-------------|---------------------------|----------|
|          | 3 months                                                           | 6 months    | 3 months                  | 6 months |
| Ankrd1   | 6.64                                                               | 8.35 (6.34) | 5.74                      | 20.67    |
| Cat      | 2.26                                                               | 2.16 (4.20) | 4.16                      | 4.49     |
| Gpx3     | 2.42                                                               | N.S. (3.47) | 2.51                      | 4.82     |
| Hsp90aa1 | N.S.                                                               | 2.59 (4.20) | 3.91                      | 6.02     |
| Eno3     | 0.49                                                               | 0.34 (0.41) | 0.51                      | 0.59     |
| Mdh1     | N.S.                                                               | N.S. (N.S.) | 0.59                      | 0.59     |

N.S. = not significant by ANOVA analysis or below 2-fold threshold. However, all such genes were identified as having significant changes at the threshold levels set for the pairwise analysis.

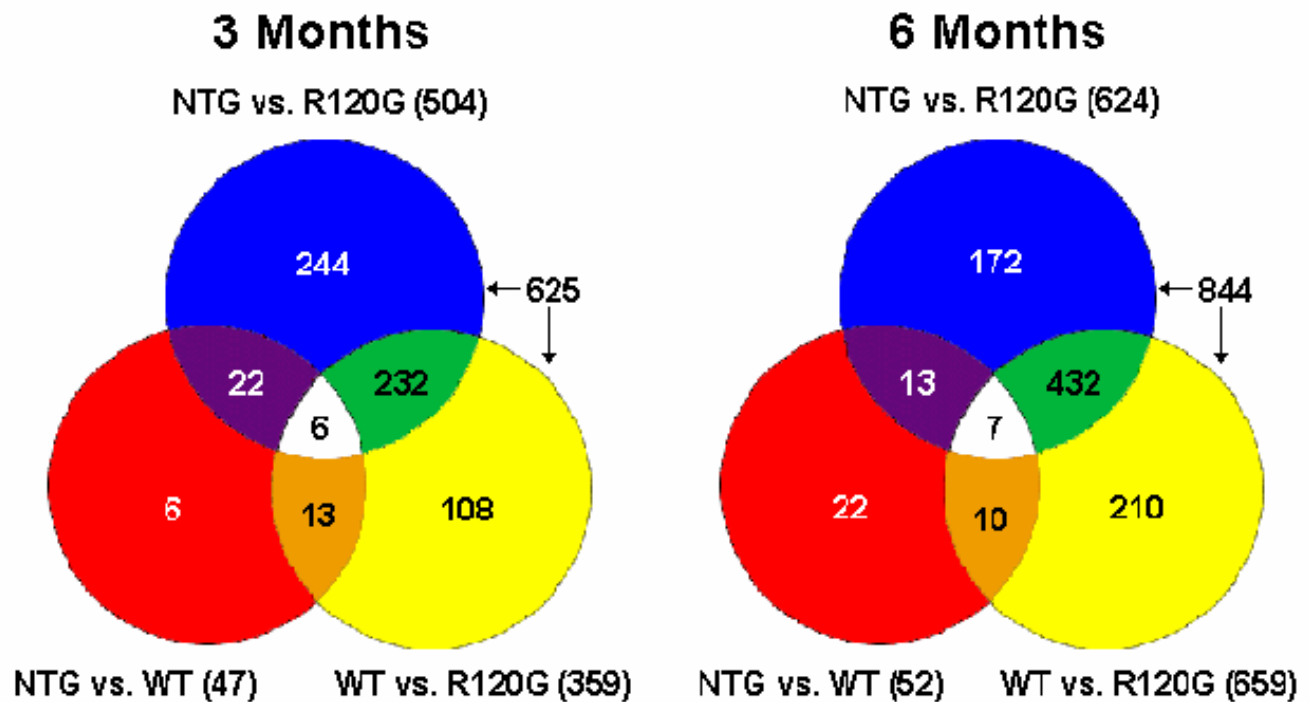

**Figure S1:** Summary of pairwise comparisons at 3 and 6 months. In each Venn diagram, circles represent the individual pairwise comparisons: NTG vs. hCryAB<sup>WT</sup> (red circle), hCryAB<sup>WT</sup> vs. hR120GCryAB (yellow circle), and NTG vs. hR120GCryAB (blue circle). Numbers in parentheses after each comparison represent the total number of sequences with significant change in expression for that comparison. Numbers inside each compartment represents the number of sequences unique for that effect or, if intersecting with another circle, the number of sequences identified for the intersecting set. Note the small number of identified sequences attributable to the hCryAB<sup>WT</sup> compared with the hR120GCryAB transgene.
